# Supplementary material for: Numbers and Mortality Risk of Hypertensive Patients with or without Elevated Body Mass Index in China
Source: MDPI journal article supplement (doi:10.3390/ijerph19010116), 2021-12-23
Supplement: s1 [file s1]

**Supplementary Table S1 Hazard ratios of premature death according to BMI and blood pressure categories in the different age and sex subgroup<sup>1,2</sup>**

|                            |                                       | Model 1*  |           | Model 2†  |           | Model 3‡  |            |
|----------------------------|---------------------------------------|-----------|-----------|-----------|-----------|-----------|------------|
|                            |                                       | HR        | 95%CI     | HR        | 95%CI     | HR        | 95%CI      |
| <b>Age&lt;65</b>           |                                       |           |           |           |           |           |            |
| <b>All-cause mortality</b> |                                       |           |           |           |           |           |            |
|                            | Normal BP and BMI                     | Reference |           | Reference |           | Reference |            |
|                            | Normal BP but elevated BMI            | 0.44      | 0.14-1.42 | 0.48      | 0.11-2.04 | 0.61      | 0.14-2.72  |
|                            | Hypertension but normal BMI           | 1.19      | 0.80-1.76 | 1.18      | 0.75-1.85 | 1.00      | 0.63-1.60  |
|                            | Grade 1 Hypertension and elevated BMI | 1.20      | 0.71-2.04 | 1.33      | 0.72-2.46 | 1.51      | 0.74-3.09  |
|                            | Grade 2 Hypertension and elevated BMI | 0.79      | 0.37-1.66 | 0.77      | 0.34-1.73 | 0.76      | 0.33-1.76  |
|                            | Grade 3 Hypertension and elevated BMI | 1.93      | 1.06-3.50 | 2.09      | 1.15-3.80 | 2.27      | 1.20-4.29  |
| <b>Premature death</b>     |                                       |           |           |           |           |           |            |
|                            | Normal BP and BMI                     | Reference |           | Reference |           | Reference |            |
|                            | Normal BP but elevated BMI            | 0.59      | 0.29-1.20 | 0.65      | 0.29-1.47 | 1.79      | 0.67-4.80  |
|                            | Hypertension but normal BMI           | 0.97      | 0.65-1.46 | 1.33      | 0.86-2.06 | 1.40      | 0.90-2.17  |
|                            | Grade 1 Hypertension and elevated BMI | 0.76      | 0.47-1.24 | 0.81      | 0.40-1.66 | 2.28      | 0.91-5.72  |
|                            | Grade 2 Hypertension and elevated BMI | 0.27      | 0.04-1.90 | 0.80      | 0.28-2.24 | 2.31      | 0.68-7.78  |
|                            | Grade 3 Hypertension and elevated BMI | 1.96      | 0.73-5.28 | 1.40      | 0.50-3.89 | 3.98      | 1.14-13.82 |
| <b>Age≥65</b>              |                                       |           |           |           |           |           |            |
| <b>All-cause mortality</b> |                                       |           |           |           |           |           |            |
|                            | Normal BP and BMI                     | Reference |           | Reference |           | Reference |            |
|                            | Normal BP but elevated BMI            | 0.88      | 0.74-1.05 | 0.97      | 0.78-1.20 | 1.55      | 1.16-2.07  |
|                            | Hypertension but normal BMI           | 3.34      | 2.90-3.85 | 1.81      | 1.54-2.14 | 1.92      | 1.62-2.27  |
|                            | Grade 1 Hypertension and elevated BMI | 1.59      | 1.24-2.03 | 0.97      | 0.73-1.29 | 1.60      | 1.12-2.28  |
|                            | Grade 2 Hypertension and elevated BMI | 2.76      | 1.90-3.40 | 1.46      | 0.98-2.17 | 2.64      | 1.65-4.23  |
|                            | Grade 3 Hypertension and elevated BMI | 4.85      | 3.23-7.29 | 2.89      | 1.89-4.40 | 4.94      | 3.07-7.95  |
| <b>Premature death</b>     |                                       |           |           |           |           |           |            |
|                            | Normal BP and BMI                     | Reference |           | Reference |           | Reference |            |
|                            | Normal BP but elevated BMI            | 0.89      | 0.74-1.08 | 0.96      | 0.76-1.21 | 1.68      | 1.22-2.31  |
|                            | Hypertension but normal BMI           | 3.08      | 2.64-3.60 | 1.86      | 1.55-2.25 | 1.99      | 1.65-2.41  |
|                            | Grade 1 Hypertension and elevated BMI | 1.47      | 1.12-1.92 | 0.98      | 0.72-1.33 | 1.76      | 1.19-2.60  |
|                            | Grade 2 Hypertension and elevated BMI | 2.28      | 1.49-3.49 | 1.30      | 0.82-2.07 | 2.62      | 1.53-4.48  |
|                            | Grade 3 Hypertension and elevated BMI | 4.85      | 3.17-7.42 | 3.10      | 1.99-4.84 | 5.89      | 3.55-9.79  |

**Male****All-cause mortality**

|                                       | Normal BP and BMI           | Reference |           | Reference |           | Reference |           |
|---------------------------------------|-----------------------------|-----------|-----------|-----------|-----------|-----------|-----------|
|                                       | Normal BP but elevated BMI  | 1.10      | 0.71-1.72 | 1.13      | 0.72-1.77 | 1.34      | 0.82-2.20 |
|                                       | Hypertension but normal BMI | 2.69      | 2.41-3.00 | 1.34      | 1.19-1.52 | 1.34      | 1.18-1.52 |
| Grade 1 Hypertension and elevated BMI | 1.78                        | 1.15-2.75 | 1.31      | 0.82-2.08 | 1.50      | 0.91-2.47 |           |
| Grade 2 Hypertension and elevated BMI | 1.45                        | 0.69-3.06 | 0.73      | 0.33-1.63 | 0.75      | 0.32-1.73 |           |
| Grade 3 Hypertension and elevated BMI | 4.67                        | 2.22-9.85 | 2.79      | 1.32-5.90 | 3.34      | 1.54-7.23 |           |

**Premature death**

|                                       | Normal BP and BMI           | Reference |           | Reference |           | Reference |           |
|---------------------------------------|-----------------------------|-----------|-----------|-----------|-----------|-----------|-----------|
|                                       | Normal BP but elevated BMI  | 0.87      | 0.67-1.13 | 0.99      | 0.73-1.35 | 1.56      | 1.03-2.35 |
|                                       | Hypertension but normal BMI | 2.48      | 2.05-2.99 | 1.75      | 1.39-2.19 | 1.82      | 1.44-2.29 |
| Grade 1 Hypertension and elevated BMI | 1.19                        | 0.84-1.69 | 0.88      | 0.59-1.33 | 1.37      | 0.82-2.28 |           |
| Grade 2 Hypertension and elevated BMI | 1.87                        | 1.11-3.13 | 1.34      | 0.76-2.36 | 2.24      | 1.17-4.29 |           |
| Grade 3 Hypertension and elevated BMI | 4.61                        | 2.71-7.87 | 3.30      | 1.87-5.80 | 5.02      | 2.65-9.52 |           |

**Female****All-cause mortality**

|                                       | Normal BP and BMI           | Reference |           | Reference |           | Reference |           |
|---------------------------------------|-----------------------------|-----------|-----------|-----------|-----------|-----------|-----------|
|                                       | Normal BP but elevated BMI  | 0.90      | 0.72-1.14 | 0.87      | 0.66-1.14 | 1.65      | 1.13-2.41 |
|                                       | Hypertension but normal BMI | 4.36      | 3.59-5.30 | 1.62      | 1.30-2.03 | 1.72      | 1.37-2.16 |
| Grade 1 Hypertension and elevated BMI | 1.78                        | 1.29-2.47 | 0.87      | 0.60-1.26 | 1.76      | 1.11-2.79 |           |
| Grade 2 Hypertension and elevated BMI | 4.01                        | 2.58-6.23 | 1.45      | 0.90-2.35 | 3.40      | 1.89-6.14 |           |
| Grade 3 Hypertension and elevated BMI | 5.39                        | 3.31-8.77 | 1.94      | 1.16-3.23 | 4.50      | 2.46-8.25 |           |

**Premature death**

|                                       | Normal BP and BMI           | Reference |           | Reference |           | Reference  |           |
|---------------------------------------|-----------------------------|-----------|-----------|-----------|-----------|------------|-----------|
|                                       | Normal BP but elevated BMI  | 0.93      | 0.72-1.20 | 0.87      | 0.63-1.20 | 1.91       | 1.23-2.96 |
|                                       | Hypertension but normal BMI | 3.71      | 2.95-4.67 | 1.83      | 1.39-2.40 | 1.96       | 1.48-2.58 |
| Grade 1 Hypertension and elevated BMI | 1.91                        | 1.35-2.69 | 1.15      | 0.78-1.70 | 2.69      | 1.62-4.47  |           |
| Grade 2 Hypertension and elevated BMI | 2.66                        | 1.49-4.74 | 1.16      | 0.61-2.21 | 3.27      | 1.54-6.94  |           |
| Grade 3 Hypertension and elevated BMI | 4.87                        | 2.79-8.50 | 2.27      | 1.26-4.09 | 6.26      | 3.11-12.62 |           |

China Health and Nutrition Survey (CHNS) cohort data with baseline and last time been followed up data was used to fit the cox model.

<sup>1</sup>Elevated BMI: body mass index  $\geq 24.0$ .

<sup>2</sup>Hypertension: categories of blood pressure: normal (SBP < 120 mm Hg and DBP < 80 mm Hg), high normal (SBP 120-139 mm Hg and/or DBP 80-89 mm Hg), and hypertensive (SBP

$\geq 140$  mmHg and/or DBP  $\geq 90$  mmHg) for adults over 18 years. Hypertension is further divided into three grades, grade 1 (SBP 140-159 mm Hg and/or DBP 90-99 mm Hg), grade 2 (SBP 160-179 mm Hg and/or DBP 100-109 mm Hg), and grade 3 (SBP  $\geq 180$  mm Hg and/or DBP  $\geq 110$  mm Hg).

\*Model 1: adjusted for age, sex.

†Model 2: adjusted for age, sex, educational level, marital status, whether rural residents, history of drinking or smoking.

‡Model 3: adjusted for age, sex, educational level, marital status, whether rural residents, history of drinking or smoking, body mass index, previous history of diabetes mellitus, CVD, or cancer.
